# Supplementary material
Source: publisher figshare collection journal article supplement (https://asha.figshare.com/articles/dataset/_/13022552)
Supplement: Supplementary file 1 [file 1]

### Supplemental Material S3. References of excluded studies.

#### Not all participants between 18 and 34 years old

- Arkkila, E., Rasanen, P., Roine, R. P., Sintonen, H., & Vilkmán, E. (2008). Health-related quality of life of adults with childhood diagnosis of specific language impairment. *Folia Phoniatrica Et Logopaedica*, 60, 233-240. <https://doi.org/10.1159/000151325>
- Arkkila, E., Rasanen, P., Roine, R. P., & Vilkmán, E. (2008). Specific language impairment in childhood is associated with impaired mental and social well-being in adulthood. *Logopedics Phoniatrics Vocology*, 33(4), 179-189. <https://doi.org/10.1080/14015430802088289>
- Bahl, M., Plante, E., & Gerken, L. (2009). Processing prosodic structure by adults with language-based learning disability. *Journal of Communication Disorders*, 42(5), 313-323. <https://doi.org/10.1016/j.jcomdis.2009.02.001>
- Bishop, D. V., Hardiman, M. J., & Barry, J. G. (2012). Auditory deficit as a consequence rather than endophenotype of specific language impairment: Electrophysiological evidence. *PLoS ONE*, 7(5), e35851. <https://doi.org/10.1371/journal.pone.0035851>
- Bishop, D. V., & McArthur, G. M. (2005). Individual differences in auditory processing in specific language impairment: A follow-up study using event-related potentials and behavioural thresholds. *Cortex*, 41(3), 327-341. [https://doi.org/10.1016/S0010-9452\(08\)70270-3](https://doi.org/10.1016/S0010-9452(08)70270-3)
- Borovsky, A., Burns, E., Elman, J. L., & Evans, J. L. (2013). Lexical activation during sentence comprehension in adolescents with history of Specific Language Impairment. *Journal of Communication Disorders*, 46(5-6), 413-427. <https://doi.org/10.1016/j.jcomdis.2013.09.001>
- Clegg, J., Hollis, C., Mawhood, L., & Rutter, M. (2005). Developmental language disorders--a follow-up in later adult life. Cognitive, language and psychosocial outcomes. *Journal of Child Psychology & Psychiatry*, 46(2), 128-149. <https://doi.org/10.1111/j.1469-7610.2004.00342.x>
- Comparisonbell, W. N., & Skarakis-Doyle, E. (2007). School-aged children with SLI: The ICF as a framework for collaborative service delivery. *Journal of Communication Disorders*, 40(6), 513-535. <https://doi.org/10.1016/j.jcomdis.2007.01.001>
- Cohen, N. J., Farnia, F., & Im-Bolter, N. (2013). Higher order language competence and adolescent mental health. *Journal of Child Psychology and Psychiatry*, 54(7), 733-744. <https://doi.org/10.1111/jcpp.12060>
- Conti-Ramsden, G., Durkin, K., & Walker, A.J. (2012). The messages they send: E-mail use by adolescents with and without a history of specific language impairment (SLI). *International Journal of Language & Communication Disorders*, 47(2), 217-228. <https://doi.org/10.1111/j.1460-6984.2011.00096.x>
- Conti-Ramsden, G., & Durkin, K. (2016). What factors influence language impairment: Considering resilience as well as risk. *Folia Phoniatrica et Logopaedica*, 67(6), 293-299. <https://doi.org/10.1159/000444750>
- Conti-Ramsden, G., Durkin, K., Simkin, Z., & Knox, E. (2009). Specific language impairment and school outcomes. I: Identifying and explaining variability at the end of compulsory education. *International Journal of Language & Communication Disorders*, 44(1), 15-35. <https://doi.org/10.1080/13682820801921601>
- Durkin, K., & Conti-Ramsden, G. (2010). Young people with specific language impairment: A review of social and emotional functioning in adolescence. *Child Language Teaching and Therapy*, 26(2), 105-121. <https://doi.org/10.1177/0265659010368750>
- Durkin, K., & Conti-Ramsden, G. (2012). Frequency of educational computer use as a longitudinal predictor of educational outcome in young people with specific language impairment. *PLoS ONE*, 7(12), e52194. <https://doi.org/10.1371/journal.pone.0052194>
- Durkin, K., Simkin, Z., Knox, E., & Conti-Ramsden, G. (2009). Specific language impairment and school outcomes. II: Educational context, student satisfaction, and post-compulsory progress. *International Journal of Language & Communication Disorders*, 44(1), 36-55. <https://doi.org/10.1080/13682820801921510>
- Ellis Weismer, S., Plante, E., Jones, M., & Tomblin, J. B. (2005). A functional magnetic resonance imaging investigation of verbal working memory in adolescents with specific language impairment. *Journal of Speech, Language, and Hearing Research*, 48(2), 405-425. [https://doi.org/10.1044/1092-4388\(2005\)028](https://doi.org/10.1044/1092-4388(2005)028)
- Filippatou, D., Dimitropoulou, P., & Sideridis, G. (2009). Examining differences between students with specific learning disabilities and those with specific language disorders on cognition, emotions and psychopathology. *Learning Disabilities: A Contemporary Journal*, 7(1), 55-72.
- Hubert-Dibon, G., Bru, M., Le Guen, C. G., Launay, E., & Roy, A. (2016). Health-related quality of life for children and adolescents with specific language impairment: A cohort study by a Learning Disabilities Reference Center. *PLoS ONE*, 11(11), e0166541. <https://doi.org/10.1371/journal.pone.0166541>

- Hughes, D. M., Turkstra, L. S., & Wulfeck, B. B. (2009). Parent and self-ratings of executive function in adolescents with specific language impairment. *International Journal of Language & Communication Disorders*, 44(6), 901-916. <https://doi.org/10.1080/13682820802425693>
- Hughes, N., Chitsabesan, P., Bryan, K., Borschmann, R., Swain, N., Lennox, C., & Shaw, J. (2017). Language impairment and comorbid vulnerabilities among young people in custody. *Journal of Child Psychology and Psychiatry*, 58(10), 1106-1113. <https://doi.org/10.1111/jcpp.12791>
- Landi, N., Malins, J. G., Frost, S. J., Magnuson, J. S., Molfese, P., Ryherd, K., . . . Pugh, K. R. (2018). Neural representations for newly learned words are modulated by overnight consolidation, reading skill, and age. *Neuropsychologia*, 111, 133-144. <https://doi.org/10.1016/j.neuropsychologia.2018.01.011>
- Lewis, B. A., Freebairn, L., Tag, J., Ciesla, A. A., Iyengar, S. K., Stein, C. M., & Taylor, H. G. (2015). Adolescent outcomes of children with early speech sound disorders with and without language impairment. *American Journal of Speech-Language Pathology*, 24(2), 150-163. [https://doi.org/10.1044/2014\\_ajslp-14-0075](https://doi.org/10.1044/2014_ajslp-14-0075)
- Lovett, M. W., De Palma, M., Frijters, J., Steinbach, K., Temple, M., Benson, N., & Lacerenza, L. (2008). Interventions for reading difficulties: a comparison of response to intervention by ELL and EFL struggling readers. *Journal of Learning Disabilities*, 41(4), 333-352. <https://doi.org/10.1177/0022219408317859>
- Lum, J. A. (2013). Long-term memory: A review and meta-analysis of studies of declarative and procedural memory in specific language impairment. *Topics in Language Disorders*, 33(4), 282-297. <https://doi.org/10.1097/01.TLD.0000437939.01237.6a>
- Lum, J. A., Conti-Ramsden, G., & Lindell, A. K. (2007). The attentional blink reveals sluggish attentional shifting in adolescents with specific language impairment. *Brain and Cognition*, 63(3), 287-295. <https://doi.org/10.1016/j.bandc.2006.09.010>
- McLeod, S., & McKinnon, D. H. (2007). Prevalence of communication disorders compared with other learning needs in 14,500 primary and secondary school students. *International Journal of Language & Communication Disorders*, 42(S1), 37-59. <https://doi.org/10.1080/13682820601173262>
- Miller, C. A. (2011). Auditory processing theories of language disorders: Past, present, and future. *Language, Speech, and Hearing Services in Schools*, 42(3), 309-319. [https://doi.org/10.1044/0161-1461\(2011/10-0040\)](https://doi.org/10.1044/0161-1461(2011/10-0040))
- Mouridsen, S. E., & Hauschild, K.-M. (2008). A longitudinal study of schizophrenia- and affective spectrum disorders in individuals diagnose with a developmental language disorder as children. *Journal of Neural Transmission*, 115(11), 1591-1597. <https://doi.org/10.1007/s00702-008-0110-z>
- Mouridsen, S. E., & Hauschild, K.-M. (2009a). A long-term study of offending in individuals diagnosed with a developmental language disorder as children. *International Journal of Speech-Language Pathology*, 11(3), 171-179. <https://doi.org/10.1080/17549500802579095>
- Mouridsen, S. E., & Hauschild, K.-M. (2009b). A longitudinal study of personality disorders in individuals with and without a history of a developmental language disorder. *Logopedics Phoniatrics Vocology*, 34(3), 135-141. <https://doi.org/10.1080/14015430903117441>
- Mourdisen, S. E., & Hauschild, K.-M. (2009c). Disability pensions in individuals diagnosed with a developmental language disorder as children. *Scandinavian Journal of Disability Research*, 11(4), 275-285. <https://doi.org/10.1080/15017410902831361>
- Mouridsen, S. E., & Hauschild, K. M. (2011). Substance use disorders: findings from a longitudinal study of individuals with and without a history of developmental language disorders. *Folia Phoniatrica et Logopaedica*, 63(4), 195-200. <https://doi.org/10.1159/000316413>
- Myers, L., Davies-Jones, C., Chiat, S., Joffe, V., & Botting, N. (2011). 'A place where I can be me': A role for social and leisure provision to support young people with language impairment. *International Journal of Language & Communication Disorders*, 46(6), 739-750. <https://doi.org/10.1111/j.1460-6984.2011.00048.x>
- Navarro-Pardo, E., Moral, J. C. M., Galán, A. S., & Beitia, M. D. S. (2012). Child and adolescent development: Common mental disorders according to age and gender. *Psicothema*, 24(3), 377-383.
- Nippold, M. A. (2016). Language disorders in adolescents: Current needs and future directions. *Seminars in Speech and Language*, 37(4), 274-279. <https://doi.org/10.1055/s-0036-1587705>
- Nomura, Y., Rajendran, K., Brooks-Gunn, J., & Newcorn, J. H. (2008). Roles of perinatal problems on adolescent antisocial behaviors among children born after 33 completed weeks: A prospective investigation. *Journal of Child Psychology and Psychiatry*, 49(10), 1108-1117. <https://doi.org/10.1111/j.1469-7610.2008.01939.x>
- Northam, G. B., Liegeois, F., Tournier, J. D., Croft, L. J., Johns, P. N., Chong, W. K., . . . Baldeweg, T. (2012). Interhemispheric temporal lobe connectivity predicts language impairment in adolescents born preterm. *Brain*, 135(12), 3781-3798. <https://doi.org/10.1093/brain/aws276>

- Oram Cardy, J. E., Flagg, E. J., Roberts, W., & Roberts, T. P. (2008). Auditory evoked fields predict language ability and impairment in children. *International Journal of Psychophysiology*, 68(2), 170-175. <https://doi.org/10.1016/j.ijpsycho.2007.10.015>
- Pandolfi, J. M., Wittke, K., & Spaulding, T. J. (2016). Do adolescents with specific language impairment understand driving terminology? *Language, Speech, and Hearing Services in Schools*, 47(4), 324-333. [https://doi.org/10.1044/2016\\_lshss-15-0065](https://doi.org/10.1044/2016_lshss-15-0065)
- Pratt, C., Botting, N., & Conti-Ramsden, G. (2006). The characteristics and concerns of mothers of adolescents with a history of SLI. *Child Language Teaching & Therapy*, 22(2), 177-196. <https://doi.org/10.1191/0265659006ct301oa>
- Snow, P. C., Powell, M. B., & Sanger, D. D. (2012). Oral language competence, young speakers, and the law. *Language, Speech, and Hearing Services in Schools*, 43(4), 496-506. [https://doi.org/10.1044/0161-1461\(2012/11-0065\)](https://doi.org/10.1044/0161-1461(2012/11-0065))
- Snow, P. C., & Sanger, D. D. (2011). Restorative Justice conferencing and the youth offender: Exploring the role of oral language competence. *International Journal of Language & Communication Disorders*, 46(3), 324-333. <https://doi.org/10.3109/13682822.2010.496763>
- Snow, P. C., Woodward, M., Mathis, M., & Powell, M. B. (2016). Language functioning, mental health and alexithymia in incarcerated young offenders. *International Journal of Speech-Language Pathology*, 18(1), 20-31. <https://doi.org/10.3109/17549507.2015.1081291>
- Snowling, M. J., & Hulme, C. (2012). Annual research review: The nature and classification of reading disorders--a commentary on proposals for DSM-5. *Journal of Child Psychology and Psychiatry*, 53(5), 593-607. <https://doi.org/10.1111/j.1469-7610.2011.02495.x>
- Starling, J., Munro, N., Togher, L., & Arciuli, J. (2011). Recognising language impairment in secondary school student populations. *Australian Journal of Learning Difficulties*, 16(2), 145-158. <https://doi.org/10.1080/19404158.2011.586712>
- Steinmetz, A. B., & Rice, M. L. (2010). Cerebellar-dependent delay eyeblink conditioning in adolescents with Specific Language Impairment. *Journal of Neurodevelopmental Disorders*, 2, 243-251. <https://doi.org/10.1007/s11689-010-9058-z>
- Tuomainen, O., Stuart, N. J., & van der Lely, H. K. (2015). Phonetic categorisation and cue weighting in adolescents with Specific Language Impairment (SLI). *Clinical Linguistics & Phonetics*, 29(7), 557-572. <https://doi.org/10.3109/02699206.2015.1036464>
- Tuomainen, O. T. (2015). Auditory short-term memory trace formation for nonspeech and speech in SLI and dyslexia as indexed by the N100 and mismatch negativity electrophysiological responses. *Neuroreport*, 26(6), 374-379. <https://doi.org/10.1097/wnr.0000000000000357>
- Ullman, M. T., & Pullman, M. Y. (2015). A compensatory role for declarative memory in neurodevelopmental disorders. *Neuroscience & Biobehavioral Review*, 51, 205-222. <https://doi.org/10.1016/j.neubiorev.2015.01.008>
- Wadman, R., Durkin, K., & Conti-Ramsden, G. (2011). Social stress in young people with specific language impairment. *Journal of Adolescence*, 34, 421-431. <https://doi.org/10.1016/j.adolescence.2010.06.010>
- Waitoller, F. R., Maggin, D. M., & Trzaska, A. (2017). A longitudinal comparison of enrollment patterns of students receiving special education in urban neighborhood and charter schools. *Journal of Disability Policy Studies*, 28(1), 3-12. <https://doi.org/10.1177/1044207317694846>
- Whitehouse, A. J., Line, E. A., Watt, H. J., & Bishop, D. V. (2009a). Qualitative aspects of developmental language impairment relate to language and literacy outcome in adulthood. *International Journal of Language & Communication Disorders*, 44(4), 489-510. <https://doi.org/10.1080/13682820802708080>
- Whitehouse, A. J. O., Watt, H. J., Line, E. A., & Bishop, D. V. M. (2009b). Adult psychosocial outcomes of children with specific language impairment, pragmatic language impairment and autism. *International Journal of Language and Communication Disorders*, 44(4), 511-528. <https://doi.org/10.1080/13682820802708098>
- Wilke, M., Hauser, T. K., Krageloh-Mann, I., & Lidzba, K. (2014). Specific impairment of functional connectivity between language regions in former early preterms. *Human Brain Mapping*, 35(7), 3372-3384. <https://doi.org/10.1002/hbm.22408>
- Yew, S.G.K., & O'Kearney, R. (2013). Emotional and behavioral outcomes later in childhood and adolescence for children with specific language impairments: Meta-analyses of controlled prospective studies. *Journal of Child Psychology and Psychiatry*, 54(5), 516-524. <https://doi.org/10.1111/jcpp.12009>

#### Not a longitudinal design with a control/comparison group

- Becker, T. C., & McGregor, K.K. (2016). Learning by listening to lectures is a challenge for college students with developmental language impairment. *Journal of Communication Disorders*, 64, 32-44. <https://doi.org/10.1016/j.jcomdis.2016.09.001>
- Carroll, C., & Dockrell, J. (2010). Leaving special school: Post-16 outcomes for young adults with specific language impairment. *European Journal of Special Needs Education*, 25(2), 131-147. <https://doi.org/10.1080/08856251003658660>
- Elbro, C. (2010). Language-learning impairments: A 30-year follow-up of language-impaired children with and without psychiatric, neurological and cognitive difficulties. *International Journal of Language & Communication Disorders*, 46(4), 437-448. <https://doi.org/10.1111/j.1460-6984.2011.00004.x>
- Parsons, S. (2011). Long-term outcomes for children with early language problems: Beating the odds. *Children & Society*, 25(3), 202-214. <https://doi.org/10.1111/j.1099-0860.2009.00274.x>

#### No outcome in presented life domains

- Aguilar, J. M., & Plante, E. (2014). Learning of grammar-like visual sequences by adults with and without language-learning disabilities. *Journal of Speech, Language, and Hearing Research*, 57(4), 1397-1404. [https://doi.org/10.1044/2014\\_JSLHR-L-13-0124](https://doi.org/10.1044/2014_JSLHR-L-13-0124)
- Armstrong, R., Arnott, W., Copland, D. A., McMahon, K., Khan, A., Najman, J. M., & Scott, J. G. (2017). Change in receptive vocabulary from childhood to adulthood: Associated mental health, education and employment outcomes. *International Journal of Language & Communication Disorders*, 52(5), 561-572. <https://doi.org/10.1111/1460-6984.12301>
- Armstrong, R., Scott, J., Copland, D., McMahon, K., Khan, A., Najman, J. M., . . . Arnott, W. (2016). Predicting receptive vocabulary change from childhood to adulthood: A birth cohort study. *Journal of Communication Disorders*, 64, 78-90. <https://doi.org/10.1016/j.jcomdis.2016.10.002>
- Bao, L., Brownlie, E. B., & Beitchman, J. H. (2016). Mental health trajectories from adolescence to adulthood: Language disorder and other childhood and adolescent risk factors. *Development and Psychopathology*, 28(2), 489-504. <https://doi.org/10.1017/S0954579415001054>
- Beitchman, J. H., Jiang, H., Koyama, E., Johnson, C. J., Escobar, M., Atkinson, L., . . . Vida, R. (2008). Models and determinants of vocabulary growth from kindergarten to adulthood. *Journal of Child Psychology & Psychiatry*, 49(6), 626-634. <https://doi.org/10.1111/j.1469-7610.2008.01878.x>
- Brownlie, E. B., Bao, L., & Beitchman, J. (2016). Childhood language disorder and social anxiety in early adulthood. *Journal of Abnormal Child Psychology*, 44(6), 1061-1070. <https://doi.org/10.1007/s10802-015-0097-5>
- Brownlie, E. B., Graham, E., Bao, L., Koyama, E., & Beitchman, J. H. (2017). Language disorder and retrospectively reported sexual abuse of girls: Severity and disclosure. *Journal of Child Psychology & Psychiatry*, 58(10), 1114-1121. <https://doi.org/10.1111/jcpp.12723>
- Brownlie, E. B., Jabbar, A., Beitchman, J., Vida, R., & Atkinson, L. (2007). Language impairment and sexual assault of girls and women: Findings from a community comparison. *Journal of Abnormal Child Psychology*, 35(4), 618-626. <https://doi.org/10.1007/s10802-007-9117-4>
- Earle, F. S., Landi, N., & Myers, E.B. (2018). Adults with specific language impairment fail to consolidate speech sounds during sleep. *Neuroscience Letters*, 666, 58-63. <https://doi.org/10.1016/j.neulet.2017.12.030>
- Grunow, H., Spaulding, T. J., Gómez, R. L., & Plante, E. (2006). The effects of variation on learning word order rules by adults with and without language-based learning disabilities. *Journal of Communication Disorders*, 39(2), 158-170. <https://doi.org/10.1016/j.jcomdis.2005.11.004>
- Hall, J., McGregor, K. K., & Oleson, J. (2017). Weaknesses in lexical-semantic knowledge among college students with specific learning disabilities: Evidence from a semantic fluency task. *Journal of Speech, Language, and Hearing Research*, 60(3), 640-653. [https://doi.org/10.1044/2016\\_JSLHR-L-15-0440](https://doi.org/10.1044/2016_JSLHR-L-15-0440)
- Hall, J., Owen Van Horne, A., McGregor, K.K., & Farmer, T. (2017). Distributional learning in college students with developmental language disorder. *Journal of Speech, Language, and Hearing Research*, 60(11), 3270-3283. [https://doi.org/10.1044/2017\\_JSLHR-L-17-0013](https://doi.org/10.1044/2017_JSLHR-L-17-0013)
- Law, J., Rush, R., Parsons, S., & Schoon, I. (2013). The relationship between gender, receptive vocabulary, and literacy from school entry through to adulthood. *International Journal of Speech-Language Pathology*, 15(4), 407-415. <https://doi.org/10.3109/17549507.2012.721897>
- Lee, J. C., Nopoulos, P. C., & Tomblin, J. B. (2013). Abnormal subcortical components of the corticostriatal system in young adults with DLI: A combined structural MRI and DTI study. *Neuropsychologia*, 51(11), 2154-2161. <https://doi.org/10.1016/j.neuropsychologia.2013.07.011>



- Lee, J. C., & Tomblin, J. B. (2012). Reinforcement learning in young adults with developmental language impairment. *Brain and Language*, 123(3), 154-163. <https://doi.org/10.1016/j.bandl.2012.07.009>
- Lee, J. C., & Tomblin, J. B. (2015). Procedural learning and individual differences in language. *Language Learning Development*, 11(3), 215-236. <https://doi.org/10.1080/15475441.2014.904168>
- McGregor, K. K., Arbisi-Kelm, T., & Eden, N. (2017). The encoding of word forms into memory may be challenging for college students with developmental language impairment. *International Journal of Speech-Language Pathology*, 19(1), 43-57. <https://doi.org/10.3109/17549507.2016.1159337>
- McGregor, K. K., Gordon, K., Eden, N., Arbisi-Kelm, T., & Oleson, J. (2017). Encoding deficits impede word learning and memory in adults with developmental language disorders. *Journal of Speech, Language, and Hearing Research*, 60(10), 2891-2905. [https://doi.org/10.1044/2017\\_jslhr-l-17-0031](https://doi.org/10.1044/2017_jslhr-l-17-0031)
- Poll, G. H., Watkins, H. S., & Miller, C. A. (2014). Lexical decay during online sentence processing in adults with specific language impairment. *Journal of Speech, Language, and Hearing Research*, 57(6), 2253-2260. [https://doi.org/10.1044/2014\\_JSLHR-L-13-0265](https://doi.org/10.1044/2014_JSLHR-L-13-0265)
- Poll, G. H., Miller, C. A., & van Hell, J. G. (2015). Evidence of compensatory processing in adults with developmental language impairment: Testing the predictions of the procedural deficit hypothesis. *Journal of Communication Disorders*, 53, 84-102. <https://doi.org/10.1016/j.jcomdis.2015.01.004>
- Poll, G. H., Miller, C. A., & van Hell, J. G. (2016). Sentence repetition accuracy in adults with developmental language impairment: Interactions of participant capacities and sentence structures. *Journal of Speech, Language, and Hearing Research*, 59, 302-316. [https://doi.org/10.1044/2015\\_JSLHR-L-15-0020](https://doi.org/10.1044/2015_JSLHR-L-15-0020)
- Rice, M. L., & Hoffman, L. (2015). Predicting vocabulary growth in children with and without specific language impairment: A longitudinal study from 2;6 to 21 years of age. *Journal of Speech, Language, and Hearing Research*, 58(2), 345-359. [https://doi.org/10.1044/2015\\_jslhr-l-14-0150](https://doi.org/10.1044/2015_jslhr-l-14-0150)
- Richardson, J., Harris, L., Plante, E., & Gerken, L. (2006). Subcategory learning in normal and language learning-disabled adults: How much information do they need? *Journal of Speech, Language, and Hearing Research*, 49(6), 1257-1266. [https://doi.org/10.1044/1092-4388\(2006/090\)](https://doi.org/10.1044/1092-4388(2006/090))
- Schoon, I., Parsons, S., Rush, R., & Law, J. (2010). Childhood language skills and adult literacy: A 29-year follow-up study. *Pediatrics*, 125(3), e459-e466. <https://doi.org/10.1542/peds.2008-2111>
- Torkildsen, J. v. K., Dailey, N. S., Aguilar, J. M., Gómez, R., & Plante, E. (2013). Exemplar variability facilitates rapid learning of an otherwise unlearnable grammar by individuals with language-based learning disability. *Journal of Speech, Language, and Hearing Research*, 56(2), 618-629.
- Voci, S., Beitchman, J. H., Brownlie, E. B., & Wilson, B. (2006). Social anxiety in late adolescence: The importance of early childhood language impairment. *Journal of Anxiety Disorders*, 20(7), 915-930. <https://doi.org/10.1016/j.janxdis.2006.01.007>
- Whitehouse, A. J., & Bishop, D. V. (2008). Cerebral dominance for language function in adults with specific language impairment or autism. *Brain*, 131(12), 3193-3200. <https://doi.org/10.1093/brain/awn266>

#### Not specifically related to DLD

- Ahmad, F., Roy, A., Brady, S., Belgeonne, S., Dunn, L., & Pitts, J. (2007). Care pathway initiative for people with intellectual disabilities: Impact evaluation. *Journal of Nursing Management*, 15(7), 700-702. <https://doi.org/10.1111/j.1365-2934.2006.00734.x>
- Alt, M., & Gutmann, M. L. (2009). Fast mapping semantic features: Performance of adults with normal language, history of disorders of spoken and written language, and attention deficit hyperactivity disorder on a word-learning task. *Journal of Communication Disorders*, 42(5), 347-364. <https://doi.org/10.1016/j.jcomdis.2009.03.004>
- Alwell, M., & Cobb, B. (2009). Social and communicative interventions and transition outcomes for youth with disabilities: A systematic review. *Career Development for Exceptional Individuals*, 32(2), 94-107. <https://doi.org/10.1177/0885728809336657>
- Andresen, E. M., Fried-Oken, M., Peters, B., & Patrick, D. L. (2016). Initial constructs for patient-centered outcome measures to evaluate brain-computer interfaces. *Disability and Rehabilitation: Assistive Technology*, 11(7), 548-557. <https://doi.org/10.3109/17483107.2015.1027298>
- Ascherman, L. I., & Shaftel, J. (2017). Facilitating transition from high school and special education to adult life: Focus on youth with learning disorders, attention-deficit/hyperactivity disorder, and speech/language impairments. *Child and Adolescent Psychiatric Clinics of North America*, 26(2), 311-327. <https://doi.org/10.1016/j.chc.2016.12.009>

- Banaschewski, T., & Brandeis, D. (2007). Annotation: What electrical brain activity tells us about brain function that other techniques cannot tell us - A child psychiatric perspective. *Journal of Child Psychology and Psychiatry*, 48(5), 415-435. <https://doi.org/10.1111/j.1469-7610.2006.01681.x>
- Butterworth, B., & Kovas, Y. (2013). Understanding neurocognitive developmental disorders can improve education for all. *Science*, 340(6130), 300-305. <https://doi.org/10.1126/science.1231022>
- de Vries, R. S., & Schmitt, A. J. (2012). Postsecondary disability service providers' perceived usefulness of a model summary of performance. *Journal of Postsecondary Education and Disability*, 25(4), 283-296.
- Fernandes, F. D., & Behlau, M. (2013). Implications of the World Report on Disability for responding to communication disorders in Brazil. *International Journal of Speech-Language Pathology*, 15(1), 113-117. <https://doi.org/10.3109/17549507.2012.731435>
- Fidler, L. J., Plante, E., & Vance, R. (2011). Identification of adults with developmental language impairments. *American Journal of Speech-Language Pathology*, 20(1), 2-13.
- Fors, A., Abel, K. M., Wicks, S., Magnusson, C., & Dalman, C. (2013). Hearing and speech impairment at age 4 and risk of later non-affective psychosis. *Psychological Medicine*, 43(10), 2067-2076. <https://doi.org/10.1017/s0033291712002644>
- Helenius, P., Parviainen, T., Paetau, R., & Salmelin, R. (2009). Neural processing of spoken words in specific language impairment and dyslexia. *Brain*, 132(7), 1918-1927. <https://doi.org/10.1093/brain/awp134>
- Hughes, S., Schuele, C. M., & Kelly, E. (2014). Bullying: What speech-language pathologists should know. *Language, Speech, and Hearing Services in Schools*, 45(1), 3-13. [https://doi.org/10.1044/2013\\_LSHSS-13-0013](https://doi.org/10.1044/2013_LSHSS-13-0013)
- Joffe, V. L., Nippold, M. A., & Oetting, J. (2012). Progress in understanding adolescent language disorders. *Language, Speech, and Hearing Services in Schools*, 43(4), 438-444. [https://doi.org/10.1044/0161-1461\(2012/12-0052\)](https://doi.org/10.1044/0161-1461(2012/12-0052))
- Lee, N. R., Wallace, G. L., Adeyemi, E. I., Lopez, K. C., Blumenthal, J. D., Clasen, L. S., & Giedd, J. N. (2012). Dosage effects of X and Y chromosomes on language and social functioning in children with supernumerary sex chromosome aneuploidies: Implications for idiopathic language impairment and autism spectrum disorders. *Journal of Child Psychology & Psychiatry*, 53(10), 1072-1081. <https://doi.org/10.1111/j.1469-7610.2012.02573.x>
- Lyons, G. L., Huber, H. B., Carter, E. W., Chen, R., & Asmus, J. M. (2016). Assessing the social skills and problem behaviors of adolescents with severe disabilities enrolled in general education classes. *American Journal on Intellectual and Developmental Disabilities*, 121(4), 327-345. <https://doi.org/10.1352/1944-7558-121.4.327>
- Maart, S., & Jelsma, J. (2014). Disability and access to health care - a community based descriptive study. *Disability and Rehabilitation*, 36(18), 1489-1493. <https://doi.org/10.3109/09638288.2013.807883>
- Martinez-Marrero, I., & Estrada-Hernandez, N. (2008). Assistive technology: An instructional tool to assist college students with written language disabilities. *TechTrends: Linking Research and Practice to Improve Learning*, 52(1), 56-62. <https://doi.org/10.1007/s11528-008-0113-5>
- McGregor, K. K., Licandro, U., Arenas, R., Eden, N., Stiles, D., Bean, A., & Walker, E. (2013). Why words are hard for adults with developmental language impairments. *Journal of Speech, Language, and Hearing Research*, 56(6), 1845-1856. [https://doi.org/10.1044/1092-4388\(2013/12-0233\)](https://doi.org/10.1044/1092-4388(2013/12-0233))
- Miller, C. A., & Poll, G. H. (2009). Response time in adults with a history of language difficulties. *Journal of Communication Disorders*, 42(5), 365-379. <https://doi.org/10.1016/j.jcomdis.2009.04.001>
- Minihan, P. M., Morgan, J. P., Park, A., Yantsides, K. E., Nobles, C. J., Finkelman, M. D., . . . Must, A. (2014). At-home oral care for adults with developmental disabilities: A survey of caregivers. *Journal of The American Dental Association*, 145(10), 1018-1025. <https://doi.org/10.14219/jada.2014.64>
- Penn, C., Commerford, A., & Ogilvy, D. (2007). Spatial and facial processing in the signed discourse of two groups of deaf signers with clinical language impairment. *Clinical Linguistics & Phonetics*, 21(5), 369-391. <https://doi.org/10.1080/02699200701267476>
- Pickles, A., Anderson, D. K., & Lord, C. (2014). Heterogeneity and plasticity in the development of language: A 17-year follow-up of children referred early for possible autism. *Journal of Child Psychology & Psychiatry*, 55(12), 1354-1362. <https://doi.org/10.1111/jcpp.12269>
- Poll, G. H., Betz, S. K., & Miller, C. A. (2010). Identification of clinical markers of specific language impairment in adults. *Journal of Speech, Language, and Hearing Research*, 53(2), 414-429. [https://doi.org/10.1044/1092-4388\(2009/08-0016\)](https://doi.org/10.1044/1092-4388(2009/08-0016))
- Rost, G. C., & McGregor, K. K. (2012). Miranda rights comprehension in young adults with specific language impairment. *American Journal of Speech-Language Pathology*, 21(2), 101-108. [https://doi.org/10.1044/1058-0360\(2011/10-0094\)](https://doi.org/10.1044/1058-0360(2011/10-0094))

- Ryndak, D. L., Moore, M. A., Orlando, A.-M., & Delano, M. (2009). Access to the general curriculum: The mandate and role of context in research-based practice for students with extensive support needs. *Research and Practice for Persons with Severe Disabilities*, 34(1), 199-213. <https://doi.org/10.2511/rpsd.33.4.199>
- Salmelin, R. (2007). Clinical neurophysiology of language: the MEG approach. *Clinical Neurophysiology*, 118(2), 237-254. <https://doi.org/10.1016/j.clinph.2006.07.316>
- Scarborough, A. A., & McCrae, J. S. (2008). Maltreated infants: Reported eligibility for Part C and later school-age special education services. *Topics in Early Childhood Special Education*, 28(2), 75-89. <https://doi.org/10.1177/0271121408320349>
- Seedyk, M. S., Caldwell, P., & Davies, C. E. (2009). How rapidly does Intensive Interaction promote social engagement for adults with profound learning disabilities? *European Journal of Special Needs Education*, 24(2), 119-137. <https://doi.org/10.1080/08856250902793545>
- Sheng, L., Byrd, C. T., McGregor, K. K., Zimmerman, H., & Bludau, K. (2015). List memory in young adults with language learning disability. *Journal of Speech, Language, and Hearing Research*, 58(2), 336-344. <https://doi.org/10.1044/2015.JSLHR-L-13-0143>
- Snow, P. C., & Powell, M. B. (2011). Oral language competence in incarcerated young offenders: Links with offending severity. *International Journal of Speech-Language Pathology*, 13(6), 480-489. <https://doi.org/10.3109/17549507.2011.578661>
- Stoeckel, R. E., Colligan, R. C., Barbaresi, W. J., Weaver, A. L., Killian, J. M., & Katusic, S. K. (2013). Early speech-language impairment and risk for written language disorder: A population-based study. *Journal of Developmental & Behavioral Pediatrics*, 34(1), 38-44. <https://doi.org/10.1097/DBP.0b013e31827ba22a>
- Styles, V. (2008). Service users' acceptability of videoconferencing as a form of service delivery. *Journal of Telemedicine and Telecare*, 14(8), 415-420. <https://doi.org/10.1258/jtt.2008.071202>
- Turkstra, L. S., Clark, A., Burgess, S., Hengst, J. A., Wertheimer, J. C., & Paul, D. (2017). Pragmatic communication abilities in children and adults: Implications for rehabilitation professionals. *Disability and Rehabilitation*, 39(18), 1872-1885. <https://doi.org/10.1080/09638288.2016.1212113>
- Weiss-Croft, L. J., & Baldeweg, T. (2015). Maturation of language networks in children: A systematic review of 22 years of functional MRI. *Neuroimage*, 123, 269-281. <https://doi.org/10.1016/j.neuroimage.2015.07.046>
- Xiong, T., Bunning, K., Horton, S., & Hartley, S. (2011). Assessing and comparing the outcome measures for the rehabilitation of adults with communication disorders in randomised controlled trials: An International Classification of Functioning, Disability and Health approach. *Disability and Rehabilitation*, 33(22-23), 2272-2290. <https://doi.org/10.3109/09638288.2011.568666>
- Zerbeto, A. B., & Chun, R. Y. (2013). Quality of life of caregivers of children and adolescents with speech and language disorders. *CoDAS*, 25(2), 128-134.

#### Not original data

- James, E., Gaskell, M. G., Weighall, A., & Henderson, L. (2017). Consolidation of vocabulary during sleep: The rich get richer? *Neuroscience & Biobehavioral Reviews*, 77, 1-13. <https://doi.org/10.1016/j.neubiorev.2017.01.054>
- Hall, J., Owen Van Horne, A. J., McGregor, K. K., & Farmer, T. A. (2018). Individual and developmental differences in distributional learning. *Language, Speech, and Hearing Services in Schools*, 49(3 SI), 694-709. <https://doi.org/10.1044/2018.LSHSS-STLT1-17-0134>
- Rice, M. L. (2013). Language growth and genetics of specific language impairment. *International Journal of Speech-Language Pathology*, 15(3), 223-233. <https://doi.org/10.3109/17549507.2013.783113>
