# Supplementary material
Source: publisher figshare collection journal article supplement (https://asha.figshare.com/articles/dataset/_/13022552)
Supplement: Supplementary file 3 [file 1]

## Supplemental Material S2. References of all included studies.

- Beitchman, J. H., Brownlie, E. B., & Bao, L. (2014). Age 31 mental health outcomes of childhood language and speech disorders. *Journal of the Canadian Academy of Child and Adolescent Psychiatry*, 53(10), 1102-1110. <https://doi.org/10.1016/j.jaac.2014.07.006>
- Botting, N., Durkin, K., Toseeb, U., Pickles, A., & Conti-Ramsden, G. (2016). Emotional health, support, and self-efficacy in young adults with a history of language impairment. *British Journal of Developmental Psychology*, 34(4), 538-554. <https://doi.org/10.1111/bjdp.12148>
- Botting, N., Toseeb, U., Pickles, A., Durkin, K., & Conti-Ramsden, G. (2016). Depression and anxiety change from adolescence to adulthood in individuals with and without language impairment. *PLoS ONE*, 11(7), e0156678. <https://doi.org/10.1371/journal.pone.0156678>
- Conti-Ramsden, G., & Durkin, K. (2012). Postschool educational and employment experiences of young people with specific language impairment. *Language, Speech, and Hearing Services in Schools*, 43(4), 507-520. [https://doi.org/10.1044/0161-1461\(2012/11-0067\)](https://doi.org/10.1044/0161-1461(2012/11-0067))
- Conti-Ramsden, G., Durkin, K., Mok, P. L. H., Toseeb, U., & Botting, N. (2016). Health, employment and relationships: Correlates of personal wellbeing in young adults with and without a history of childhood language impairment. *Social Science and Medicine*, 160, 20-28. <https://doi.org/10.1016/j.socscimed.2016.05.014>
- Conti-Ramsden, G., Durkin, K., Toseeb, U., Botting, N., & Pickles, A. (2018). Education and employment outcomes of young adults with a history of developmental language disorder. *International Journal of Language & Communication Disorders*, 53(2), 237-255. <https://doi.org/10.1111/1460-6984.12338>
- Durkin, K., Toseeb, U., Pickles, A., Botting, N., & Conti-Ramsden, G. (2016). Learning to drive in young adults with language impairment. *Transportation Research Part F: Traffic Psychology and Behaviour*, 42, 195-204. <https://doi.org/10.1016/j.trf.2016.07.015>
- Durkin, K., Toseeb, U., Botting, N., Pickles, A., & Conti-Ramsden, G. (2017). Social confidence in early adulthood among young people with and without a history of language impairment. *Journal of Speech, Language, and Hearing Research*, 60(6), 1635-1647. [https://doi.org/10.1044/2017\\_JSLHR-L-16-0256](https://doi.org/10.1044/2017_JSLHR-L-16-0256)
- Johnson, C. J., Beitchman, J. H., & Brownlie, E. B. (2010). Twenty-year follow-up of children with and without speech-language impairments: Family, educational, occupational, and quality of life outcomes. *American Journal of Speech-Language Pathology*, 19(1), 51-65. [https://doi.org/10.1044/1058-0360\(2009/08-0083\)](https://doi.org/10.1044/1058-0360(2009/08-0083))
- Law, J., Rush, R., Schoon, I., & Parsons, S. (2009). Modeling developmental language difficulties from school entry into adulthood: Literacy, mental health, and employment outcomes. *Journal of Speech, Language, and Hearing Research*, 52(6), 1401-1416. [https://doi.org/10.1044/1092-4388\(2009/08-0142\)](https://doi.org/10.1044/1092-4388(2009/08-0142))
- Lewis, B. A., Patton, E., Freebairn, L., Tag, J., Iyengar, S. K., Stein, C. M., & Taylor, H. G. (2016). Psychosocial co-morbidities in adolescents and adults with histories of communication disorders. *Journal of Communication Disorders*, 61, 60-70. <https://doi.org/10.1016/j.jcomdis.2016.03.004>
- Schoon, I., Parsons, S., Rush, R., & Law, J. (2010). Children's language ability and psychosocial development: A 29-year follow-up study. *Pediatrics*, 126(1), e73-80. <https://doi.org/10.1542/peds.2009-3282>
- Toseeb, U., Pickles, A., Durkin, K., Botting, N., & Conti-Ramsden, G. (2017). Prosociality from early adolescence to young adulthood: A longitudinal study of individuals with a history of language impairment. *Research in Developmental Disabilities*, 62, 148-159. <https://doi.org/10.1016/j.ridd.2017.01.018>
- Winstanley, M., Durkin, K., Webb, R. T., & Conti-Ramsden, G. (2018). Financial capability and functional financial literacy in young adults with developmental language disorder. *Autism & Developmental Language Impairments*, 3, 1-11. <https://doi.org/10.1177/2396941518794500>
- Winstanley, M., Webb, R. T., & Conti-Ramsden, G. (2018). More or less likely to offend? Young adults with a history of identified developmental language disorders. *International Journal of Language & Communication Disorders*, 53(2), 256-270. <https://doi.org/10.1111/1460-6984.12339>
